# Supplementary material for: A flexible bimodal sensor based on an electrospun nanofibrous structure for simultaneous pressure–temperature detection
Source: Royal Society of Chemistry journal article supplement (doi:10.1039/c9nr03098k), 2019-01-01
Supplement: c9nr03098k1.pdf [file c9nr03098k1.pdf]

## Supporting Information

### **Flexible Bimodal Sensor Based on Electrospun Nanofibrous Structure for Simultaneous Pressure-Temperature Detection**

*Zhihui Wang, Ling Zhang\*, Jin Liu, Chunzhong Li\**

Key Laboratory for Ultrafine Materials of Ministry of Education, Shanghai Engineering Research Center of Hierarchical Nanomaterials, School of Materials Science and Engineering, East China University of Science & Technology, Shanghai 200237, China.

E-mail: zlingzi@ecust.edu.cn (L. Zhang), czli@ecust.edu.cn (C. Li). Tel: +86-21-64252055, Fax: +86-21-64250624.

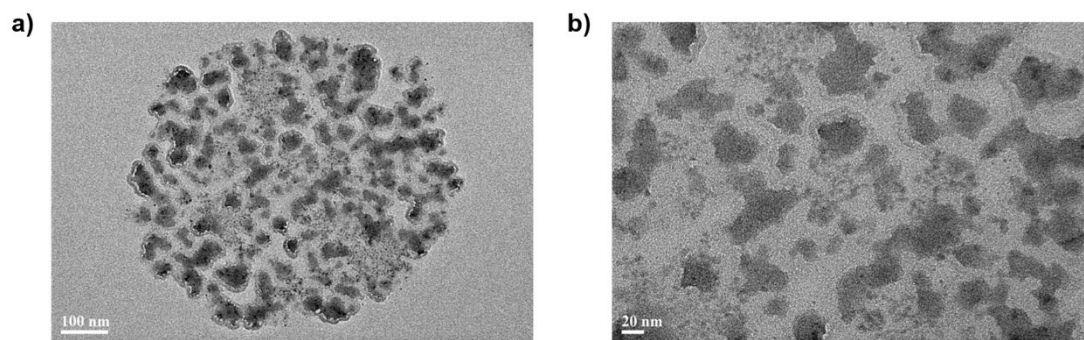

**Fig. S1** (a) Cross-section TEM image of AgNP@SBS composite fiber, (b) the magnified image.

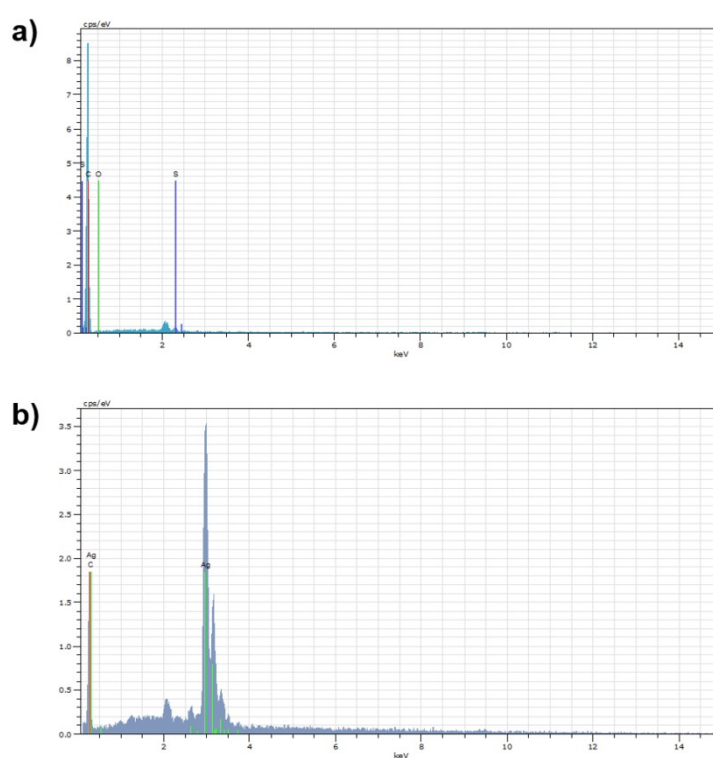

**Fig. S2** EDS spectrum of PEDOT@SBS fiber (a) and AgNP@SBS fiber (b).

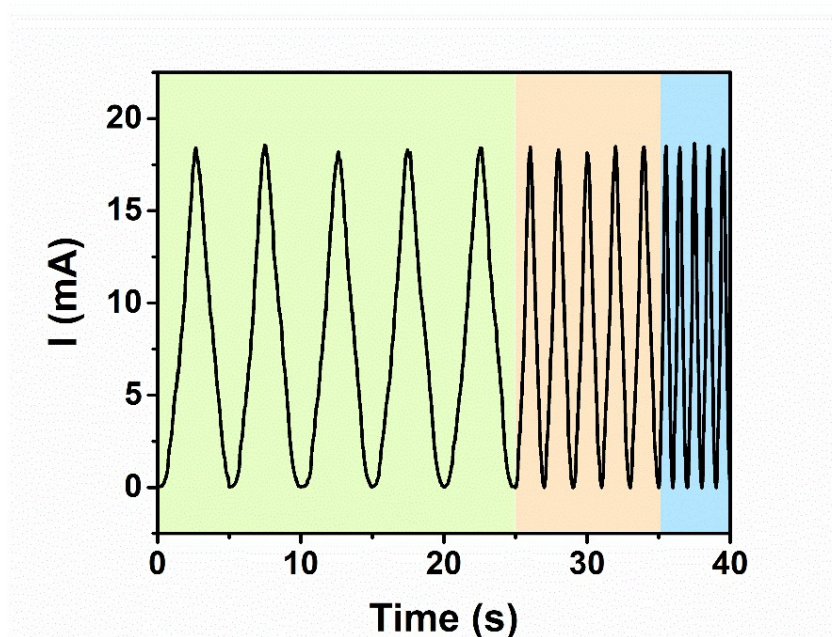

**Fig. S3** Current response at different frequencies.

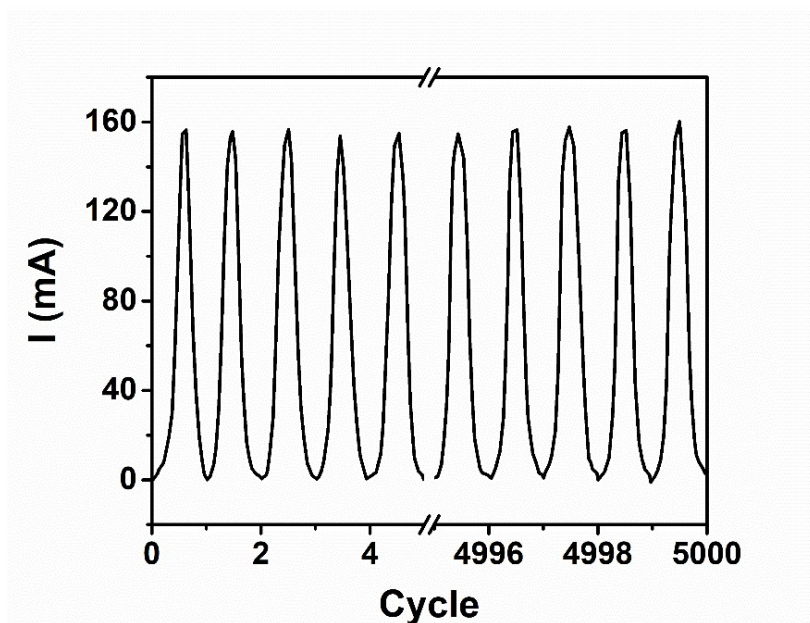

**Fig. S4** Magnified curve of current response in cyclic loading-unloading process.

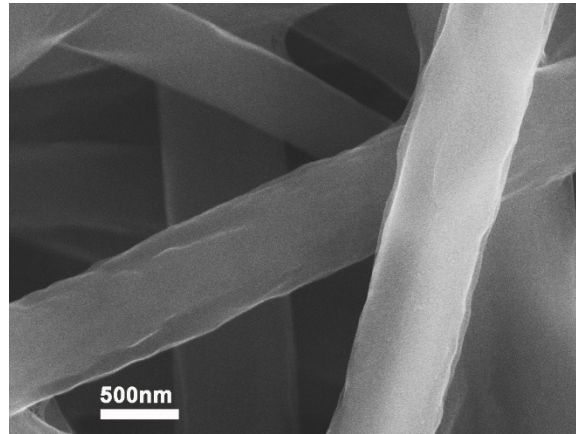

**Fig. S5** SEM image of PEDOT:PSS/SBS composite fiber after 5000 cycles.

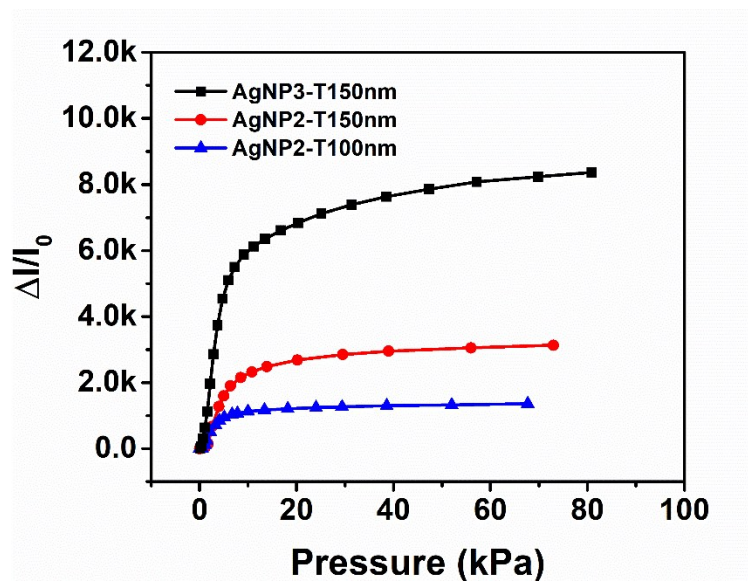

**Fig. S6** The normalized current variation versus pressure curve of the sensor with different AgNP density and nanofiber mat thickness; AgNP<sub>n</sub>: n is the number of deposition times, and T represents thickness of nanofiber mat.

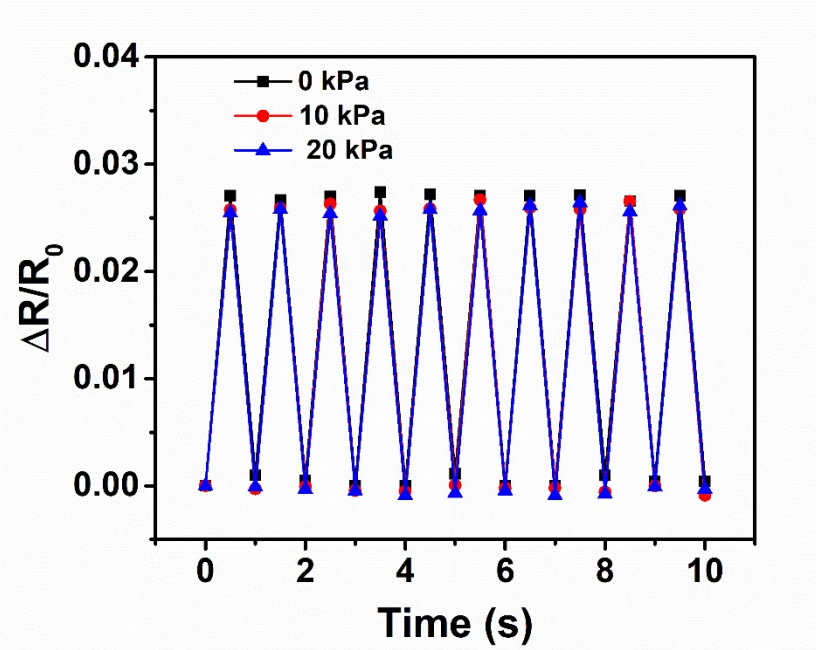

Fig. S7 Temperature response curve under different pressure loadings.

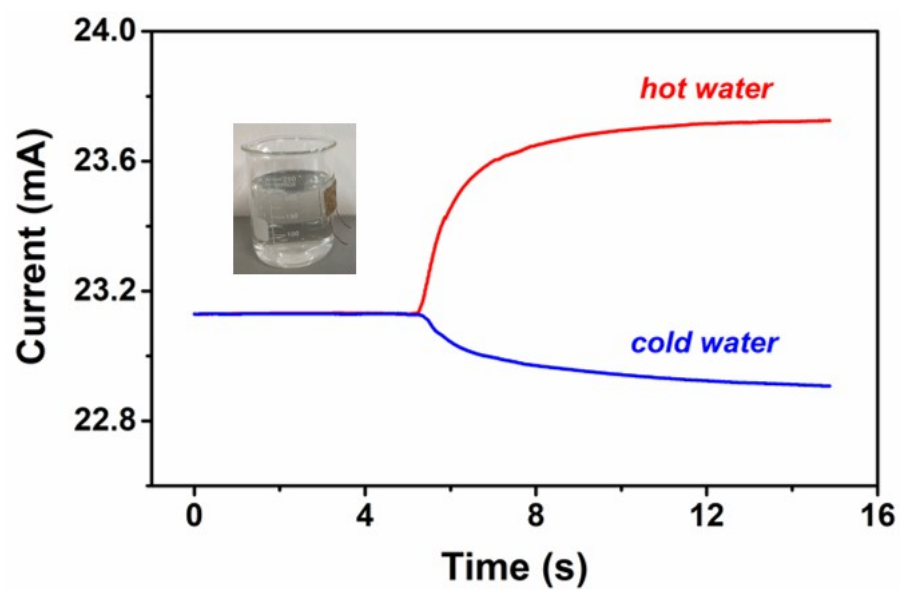

**Fig. S8** Real-time response to temperature change of the bimodal sensor attached on beaker.
